## Copy number gain of VCX, X-linked multi-copy gene, leads to cell proliferation and apoptosis during spermatogenesis

Juan Ji<sup>1,2,4,\*</sup>, Yufeng Qin<sup>3,\*</sup>, Rong Wang<sup>5,\*</sup>, Zhenyao Huang<sup>1,2</sup>, Yan Zhang<sup>1,2</sup>, Ran Zhou<sup>1,2</sup>, Ling Song<sup>1,2</sup>, Xiufeng Ling<sup>4</sup>, Zhibin Hu<sup>1,6</sup>, Dengshun Miao<sup>1,5</sup>, Hongbing Shen<sup>1,6</sup>, Yankai Xia<sup>1,2</sup>, Xinru Wang<sup>1,2</sup>, Chuncheng Lu<sup>1,2</sup>

<sup>1</sup>State Key Laboratory of Reproductive Medicine, Institute of Toxicology, Nanjing Medical University, Nanjing, China

<sup>2</sup>Key Laboratory of Modern Toxicology of Ministry of Education, School of Public Health, Nanjing Medical University, Nanjing, China

<sup>3</sup>Epigenetics and Stem Cell Biology Laboratory, National Institute of Environmental Health Sciences, Research Triangle Park, NC, USA

<sup>4</sup>Department of Children Health Care, Nanjing Maternity and Child Health Care Hospital Affiliated to Nanjing Medical University, Nanjing, China

<sup>5</sup>Research Center for Bone and Stem Cells, Department of Anatomy, Histology, and Embryology, Nanjing Medical University, Nanjing, China

<sup>6</sup>Department of Epidemiology and Biostatistics and Key Laboratory of Modern Toxicology of Ministry of Education, School of Public Health, Nanjing Medical University, Nanjing, China

\*These authors contributed equally to this work and joint first authors

**Correspondence to:** Chuncheng Lu, **email:** chunchenglu@njmu.edu.cn

**Keywords:** copy number variations, non-obstructive azoospermia

**Received:** April 08, 2016

**Accepted:** September 25, 2016

**Published:** October 01, 2016

### ABSTRACT

**Male factor infertility affects one-sixth of couples worldwide, and non-obstructive azoospermia (NOA) is one of the most severe forms. In recent years there has been increasing evidence to implicate the participation of X chromosome in the process of spermatogenesis. To uncover the roles of X-linked multi-copy genes in spermatogenesis, we performed systematic analysis of X-linked gene copy number variations (CNVs) and Y chromosome haplogrouping in 447 idiopathic NOA patients and 485 healthy controls. Interestingly, the frequency of individuals with abnormal level copy of Variable charge, X-linked (VCX) was significantly different between cases and controls after multiple test correction ( $p = 5.10 \times 10^{-5}$ ). To discriminate the effect of gain/loss copies in these genes, we analyzed the frequency of X-linked multi-copy genes in subjects among subdivided groups. Our results demonstrated that individuals with increased copy numbers of Nuclear RNA export factor 2 (NXF2) ( $p = 9.21 \times 10^{-8}$ ) and VCX ( $p = 1.97 \times 10^{-4}$ ) conferred the risk of NOA. *In vitro* analysis demonstrated that increasing copy number of VCX could upregulate the gene expression and regulate cell proliferation and apoptosis. Our study establishes a robust association between the VCX CNVs and NOA risk.**

### INTRODUCTION

Male infertility, a common reproductive disorder, is estimated to affect approximately one-sixth of couples worldwide [1]. A significant proportion of male infertility is accompanied by idiopathic azoospermia, most often presenting as non-obstructive azoospermia (NOA), defined as the absence of sperm in the ejaculate without the obstruction of reproductive tract. Certain pathogenic

genetic causes, especially the Yq microdeletions, in male infertility are well established so far [2–4]. However, X-linked genes and their potential effects on male infertility are less well understood.

Originally, it was thought that mammalian X chromosomes were enriched in spermatogenesis genes expressed before meiosis and deficient after meiosis [5–7]. The paucity of post-meiotic genes on the X chromosome has been interpreted as a consequence of Meiotic Sex

Chromosome Inactivation (MSCI) [8, 9]. Recently, Zhang et al. noticed that some testis-specific genes could be detected throughout all stages of spermatogenesis, indicating that they escape MSCI [10]. And it was estimated that 70% of these genes were expressed in post-meiotic stages [10]. Interestingly, the majority of these genes are multi-copy X-linked genes, moreover, the more copies of a gene, the higher chance to escape from X inactivation, accounting for higher expression level of multi-copy X-linked genes than that of single-copy X-linked genes [11].

With the rapid development of genome-scanning technologies [12], the structural variations in human genome were emerged and fully uncovered [13]. One type of structural variations is copy number variation (CNV) that generally defined as a segment of DNA (1 kb or larger), presenting at a variable copy number compared to a reference genome [13]. It has been demonstrated that CNV was associated with numerous diseases [14], including Alzheimer's disease, Parkinson disease, congenital scoliosis [15–17]. Recently, increasing evidence implied that CNVs were crucial determinant of spermatogenesis and might contribute to male infertility [18–20], while little is known about the relationship between X-linked gene CNVs and NOA.

To systematically analyze X-linked gene CNVs and their effects on NOA, we performed comprehensive molecular analyses in 447 idiopathic NOA men and 485 healthy controls. Eventually, the CNVs of Variable charge, X-linked (*VCX*) and Nuclear RNA export factor 2 (*NXF2*) were found to be associated with NOA, subsequently *in vitro* analysis was carried out to clarify the potential role of *VCX* in spermatogenesis.

## RESULTS

### Characteristics and clinical parameters of the study population

Our study included 447 NOA patients and 485 fertile controls. The mean age and BMI in control group were 30.1 and 24.3, and in case group was 29.5 and 23.3, respectively (Table 1). There were no significant differences identified between the case and control groups with regard to their age, smoking and drinking status. However, significant differences were identified in BMI between cases and controls (Table 1).

### Y-hg distribution between the case and control groups

To test for the potential influence of genetic backgrounds, 14 Y chromosome binary markers were used to define 14 Y-hgs in patients and normal subjects (controls). No significant difference in the Y-hg distribution was found between the healthy control group and the NOA case group (Supplementary Material, Table S1), which

suggested that the genetic background, mainly Y-hgs, may not affect our results of the present association study.

### X-linked multi-copy gene copy number variations and NOA

Overall, seven X-linked gene copy numbers were determined in 447 NOA patients and 485 healthy controls using the AccuCopy method. The distributions of copy number of seven genes in case and control groups were shown in Table 2. We found that the frequency of individuals with abnormal copy number of *NXF2* (OR, 2.46, 95% CI 1.15–5.25,  $p = 1.66 \times 10^{-2}$ ) and *VCX* (OR, 2.53, 95% CI 1.60–4.02,  $p = 5.10 \times 10^{-5}$ ) in NOA group was significantly higher than that in control group, while the frequency of *FAM47* (OR, 0.27, 95% CI 0.07–0.95,  $p = 2.89 \times 10^{-2}$ ) was significantly lower in NOA groups (Table 2). However, only the association between *VCX* and NOA risk retained after Bonferroni correction (Table 2).

To discriminate the effects of copy number gain or loss in these genes on NOA, we subdivided the subjects into three subgroups: the common level copy group, the less than common level group and the more than common level group. The detailed distributions were shown in Table 3. Our results demonstrated that 10 out of 485 (~2%) was found with decreased *NXF2* copy number in the control group, while no one was found in the NOA group. On the contrary, 22 out of 447 (~5%) were found with increased *NXF2* copy number in NOA group, while no one was found in the control group. Namely, decreased *NXF2* copy number showed protective against NOA ( $p = 2.20 \times 10^{-3}$ ), while increased copy number conferred the risk of NOA ( $p = 9.21 \times 10^{-8}$ ).

To the *VCX* gene, the frequency of individuals with increased *VCX* gene copy number in the NOA group (56 out of 447, ~13%) was significantly higher than that in the fertility/normozoospermia group (27 out of 485, ~6%) (OR, 2.46, 95% CI 1.52–3.97,  $p = 1.97 \times 10^{-4}$ ).

### *VCX* expression in germ cells and seminal plasma

To explore the transfection efficiency of *VCX* in 293 and GC cell lines, we measured the *VCX* expression before and after transfection. As it showed (Supplementary Material, Figure S1A–S1C), the *VCX* expression was significantly increased after transfected. Besides, to investigate whether the *VCX* copy number gains lead to mRNA overexpression, the mRNA level of *VCX* in seminal plasma was detected, and we found that the mRNA expression of *VCX* was increased in NOA (Supplementary Figure S1D).

### Effects of *VCX* on cell proliferation, cell apoptosis and cell cycle

By searching Database of Genomic Variants (DGV), we found that most frequent structure variations in *NXF2*

**Table 1: Main characteristics and clinical parameters of study subjects**

| Variables                            | Controls (n = 485) | Cases (n = 447)         |
|--------------------------------------|--------------------|-------------------------|
| Age (years) [mean ± SD]              | 30.1 ± 4.7         | 29.5 ± 5.0              |
| Smoking Status [n, (%)]              |                    |                         |
| Never Smokers                        | 329 (68%)          | 318 (71%)               |
| Ever Smokers                         | 156 (32%)          | 129 (29%)               |
| Alcohol consumption [n, (%)]         |                    |                         |
| Never drinkers                       | 332 (68%)          | 313 (70%)               |
| Ever drinkers                        | 153 (32%)          | 134 (30%)               |
| BMI (kg/m <sup>2</sup> ) [mean ± SD] | 24.3 ± 3.2         | 23.3 ± 3.0 <sup>a</sup> |

<sup>a</sup>*P* < 0.05 for Student's *t* test and Wilcoxon rank sum test for selected characteristics distributions between the control and case groups.

**Table 2: Distributions of *CSAG*, *CTAG*, *CT45*, *FAM47*, *H2AFB1*, *NXF2* and *VCX* gene copy numbers in subjects**

| Gene <sup>a</sup> | Fertile Controls (485)    |                             | Infertile Cases (447)     |                             | OR(95%CI)         | <i>P</i> value           |
|-------------------|---------------------------|-----------------------------|---------------------------|-----------------------------|-------------------|--------------------------|
|                   | Common level copies n (%) | Abnormal level copies n (%) | Common level copies n (%) | Abnormal level copies n (%) |                   |                          |
| <i>CSAG</i>       | 470 (96.91)               | 15 (3.09)                   | 423 (94.63)               | 24 (5.37)                   | 1.78 (0.92–3.43)  | 8.29 × 10 <sup>-2</sup>  |
| <i>CT45</i>       | 198 (40.82)               | 287 (59.18)                 | 162 (36.24)               | 285 (63.76)                 | 1.21 (0.93–1.58)  | 1.51 × 10 <sup>-1</sup>  |
| <i>CTAG</i>       | 467 (96.29)               | 18 (3.71)                   | 430 (96.20)               | 17 (3.80)                   | 1.03 (0.52, 2.02) | 9.41 × 10 <sup>-2</sup>  |
| <i>FAM47</i>      | 473 (97.53)               | 12 (2.47)                   | 444 (99.33)               | 3 (0.67)                    | 0.27 (0.07, 0.95) | 2.89 × 10 <sup>-2</sup>  |
| <i>H2AFB1</i>     | 462 (95.26)               | 23 (4.74)                   | 414 (92.62)               | 33 (7.38)                   | 1.60 (0.93, 2.77) | 9.02 × 10 <sup>-2</sup>  |
| <i>NXF2</i>       | 475 (97.94)               | 10 (2.06)                   | 425 (95.08)               | 22 (4.92)                   | 2.46 (1.15–5.25)  | 1.66 × 10 <sup>-2</sup>  |
| <i>VCX</i>        | 456 (94.02)               | 29 (5.98)                   | 385 (86.13)               | 62 (13.87)                  | 2.53 (1.60, 4.02) | 5.10 × 10 <sup>-5†</sup> |

<sup>†</sup>*P* value retained after multiple test correction.

were copy number loss, and didn't match what we observed that gaining copy was a risk in NOA. Additionally, its frequency was much lower (27/873, 3%) than *VCX* (2/9, 22%). Thus, in the functional study, we only included *VCX*. In an attempt to determine whether *VCX* have effects on cell functions, we over expressed *VCX* in 293T cells, GC-1 and GC-2 cells. As shown in Figure 1, cell apoptosis was significantly increased in the 293T cells (*p* = 1.76 × 10<sup>-2</sup>, Figure 1A–1C) and GC-1 cells (*p* = 9.40 × 10<sup>-3</sup>, Figure 2A–2C) after over expressed *VCX*. Although no significant difference of apoptosis was found in GC-2 cells, similar trends were observed (Figure 3A–3C), suggesting that *VCX* exerts a growth inhibitor. To further validate this, we carried out MTT (3-(4,5-dimethyl-2-thiazolyl)-2,5-diphenyl-2-H-tetrazolium bromide) assays. Consistent with the cell apoptosis analysis, cell proliferation significantly decreased in cells with high expression level of *VCX* (*p* = 9.47 × 10<sup>-3</sup>, Figure 1D; *p* = 9.99 × 10<sup>-3</sup>, Figure. 2D; *p* = 1.70 × 10<sup>-3</sup>, Figure 3D), revealing that growth inhibition was accompanied with increased apoptosis. Besides,

high expression level of *VCX* affected cell cycle in GC-1 cells (*p* = 4.35 × 10<sup>-2</sup>, Figure 2E–2G) and GC-2 cells (*p* = 3.69 × 10<sup>-2</sup>, Figure 3E–3G), indicating that *VCX* delayed cell progression in G1 to S transition. However, no significant difference was observed in 293T cells (Figure 1E–1G).

## DISCUSSION

X chromosome was derived from autosomal chromosome and under natural selection, and its gene content changed largely, some of which were multi-copy genes [21]. The roles of X-linked CNVs in cognitive disorders [22, 23], primary ovarian insufficiency [24] and premature ovarian failure [25] have been investigated extensively, while few studies have reported the associations between X-linked CNVs and male infertility. Recently, accumulating evidence revealed that infertile men had significantly higher duplication or deletion load than normal controls [26–28].

**Table 3: The distribution of copy number variation of selected X chromosome multicopy genes in the azoospermia and normozoospermia groups**

| Gene          | CNV                    | Azoospermia (447) |       | Normozoospermia (485) |       | Codominant Model  |                       |
|---------------|------------------------|-------------------|-------|-----------------------|-------|-------------------|-----------------------|
|               |                        | n                 | %     | n                     | %     | OR                | P value               |
| <i>CSAG</i>   | Common level copy(4)   | 423               | 94.63 | 470                   | 96.91 | -                 | -                     |
|               | Less than common level | 3                 | 0.67  | 0                     | 0.00  | -                 | $1.07 \times 10^{-2}$ |
|               | More than common level | 21                | 4.70  | 15                    | 3.09  | 1.56 (0.79–3.06)  | $2.00 \times 10^{-1}$ |
| <i>CT45</i>   | Common level copy(6)   | 162               | 36.24 | 198                   | 40.82 | -                 | -                     |
|               | Less than common level | 156               | 34.90 | 144                   | 29.69 | 1.32 (0.97–1.80)  | $7.30 \times 10^{-2}$ |
|               | More than common level | 129               | 28.86 | 143                   | 29.48 | 1.10 (0.80–1.51)  | $5.45 \times 10^{-1}$ |
| <i>CTAG</i>   | Common level copy(3)   | 430               | 96.20 | 467                   | 96.29 | -                 | -                     |
|               | Less than common level | 0                 | 0.00  | 0                     | 0.00  | -                 | 1.00                  |
|               | More than common level | 17                | 3.80  | 18                    | 3.71  | 1.03 (0.52–2.02)  | $9.41 \times 10^{-1}$ |
| <i>FAM47</i>  | Common level copy(2)   | 444               | 99.33 | 473                   | 97.53 | -                 | -                     |
|               | Less than common level | 0                 | 0.00  | 0                     | 0.00  | -                 | 1.00                  |
|               | More than common level | 3                 | 0.67  | 12                    | 2.47  | 0.27 (0.75–0.95)  | $4.10 \times 10^{-2}$ |
| <i>H2AFB1</i> | Common level copy(3)   | 414               | 92.62 | 462                   | 95.26 | -                 | -                     |
|               | Less than common level | 2                 | 0.45  | 0                     | 0.00  | -                 | $2.24 \times 10^{-1}$ |
|               | More than common level | 31                | 6.94  | 23                    | 4.74  | 1.50 (0.86–2.62)  | $1.50 \times 10^{-1}$ |
| <i>NXF2</i>   | Common level copy(4)   | 425               | 95.08 | 475                   | 97.94 | -                 | -                     |
|               | Less than common level | 0                 | 0.00  | 10                    | 2.06  | -                 | $2.20 \times 10^{-3}$ |
|               | More than common level | 22                | 4.92  | 0                     | 0.00  | -                 | $9.27 \times 10^{-8}$ |
| <i>VCX</i>    | Common level copy(4)   | 385               | 86.13 | 456                   | 94.02 | -                 | -                     |
|               | Less than common level | 6                 | 1.34  | 2                     | 0.41  | 3.55 (0.71–17.71) | $1.22 \times 10^{-1}$ |
|               | More than common level | 56                | 12.53 | 27                    | 5.57  | 2.46 (1.52–3.97)  | $1.97 \times 10^{-4}$ |

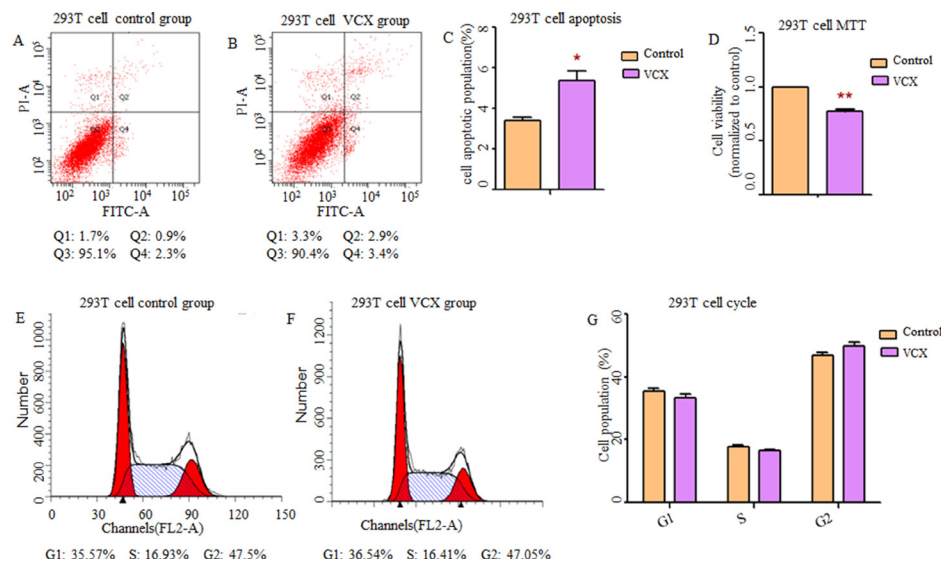

**Figure 1: Effect of VCX on cell apoptosis, cell proliferation and cell cycle in 293T cells. (A, B)** Assessment of cell apoptosis was detected by flow cytometry. Cells in the Q2 and Q4 quadrant were late apoptotic and early apoptotic, respectively. **(C)** The percentage of apoptotic cells (Q2 + Q4) was presented in histogram and there was significant up-regulation of cell apoptosis in 293T cells transfected with VCX. **(D)** Cell growth activity was markedly inhibited. **(E, F)** representative histogram depicting cell-cycle profiles of control group and VCX group, respectively. **(G)** Various phases of the cell cycle was showed and there was no significant difference between the two groups, Each data point represented the mean  $\pm$  SE from three separate experiments in which treatments were performed in triplicate. \* $P < 0.05$ .

In this study, we hypothesize that the copy number variations of X-linked multi-copy genes confer the risk of male infertility. We explored the role of X-linked CNVs in 447 individuals with NOA and 485 healthy controls by applying AccuCopy assay. Amazingly, we found that the

gaining more copies of *VCX* and *NXF2* were associated with NOA.

*NXF2*, encoded by multigene families on X chromosome, is a germ cell-specific gene [29]. It has been demonstrated that *NXF2* play functions in male meiosis,

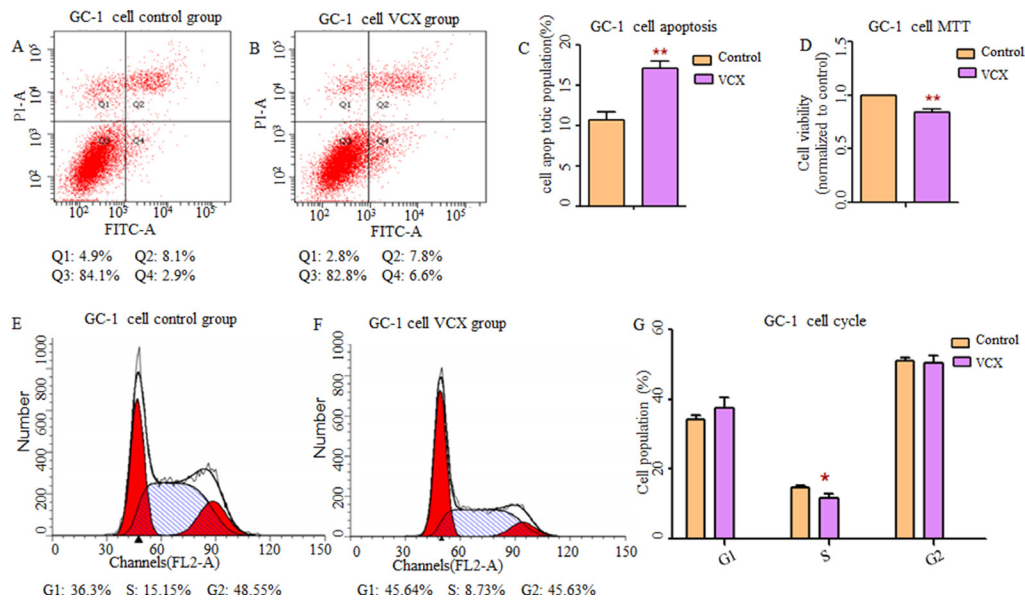

**Figure 2: Effect of *VCX* on cell apoptosis, cell proliferation and cell cycle in GC-1 cells.** (A, B) Representative histogram depicting cell apoptosis profiles of indicated cells in control group and VCX group, respectively. (C) The percentage of apoptotic cells was increased significantly in GC-1 cells transfected with *VCX*. (D) Cell proliferation was markedly inhibited. (E, F) Data of the experiment were expressed as a percentage of total cells. Results quantitated in cell cycle were shown in (G) respectively. Each data point represented the mean  $\pm$  SE from three separate experiments in which treatments were performed in triplicate. \* $P < 0.05$ , \*\* $P < 0.01$ .

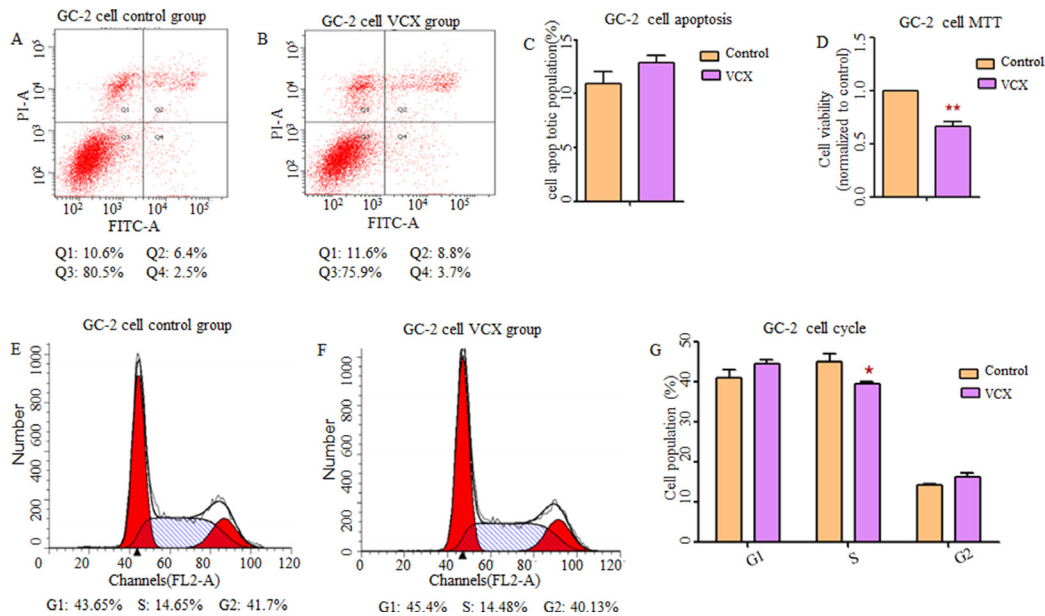

**Figure 3: Effect of *VCX* on cell apoptosis, cell proliferation and cell cycle in GC-2 cells.** (A, B, C) There was no significant difference in cell apoptosis between control group and VCX group. (D) Cell proliferation was markedly down-regulated in VCX group. (E, F, G) Cell counts in S-phase of cell cycle were markedly reduced in VCX group. Each data point represented the mean  $\pm$  SE from three separate experiments in which treatments were performed in triplicate. \* $P < 0.05$ .

spermatogonial proliferation as well as maintenance of spermatogonial stem cells [30, 31]. And the deletion of *NXF2-NXF3* genomic region on the X chromosome in male germline causes male infertility in mice [32]. Contrary to previous studies, our results demonstrated that the copy number increase of *NXF2* conferred the risk of NOA. Functional studies, including both the gain and loss of this gene, are needed to explore the potential mechanisms in the future.

*VCX* localizes on cytogenetic band Xp22.3 and contains 4 copies [33]. From DGV, we found most structure variations in Xp23 are gaining the gene copies (including *VCX*). Thus, we overexpressed *VCX in vitro* for the further investigation. As one member of novel cancer/testis (CT) antigen [34], *VCX* exclusively expresses in testis and is most likely restricted to male germ cells [35], moreover, its expression is regulated epigenetically [36]. It has been demonstrated that *VCX* was overexpressed in a subset of non-small cell lung cancer (NSCLC) cell lines and tumor tissues [37, 38], suggesting that it has oncogenic role [34]. To explore the role of *VCX* in spermatogenesis, functional analysis was performed in 293T, GC-1 and GC-2 cell lines, and our results demonstrated that *VCX* promoted cell apoptosis and inhibited cell growth, contributing to spermatogenesis impairment [39], which was probably by mediating mitochondria-dependent apoptosis pathway [40] or p53-Bax pathway [41]. Moreover, *VCX* delayed cell-progression in G1 to S transition, resulting in cell division disorder and spermatogenic failure.

In conclusion, our findings revealed that copy number gain of *VCX* attributed to NOA by an underlying mechanism that induced cell apoptosis, inhibited cell proliferation and disrupted cell cycle progression, thus *VCX* may be a potential biomarker for the susceptibility to NOA.

## MATERIALS AND METHODS

### Study population and sample collection

Study subjects were volunteers from the affiliated hospitals of Nanjing Medical University between 2010 and 2014 (NMU Infertile Study) and described previously [42, 43]. All infertile male subjects were Han Chinese men determined to have idiopathic NOA and selected on the basis of comprehensive andrological testing, including examination of medical history, physical examination, semen analysis, scrotal ultrasound, hormone analysis, karyotyping and Y chromosome microdeletion screening. Those with a history of cryptorchidism, vascular trauma, orchitis, obstruction of the vas deferens, vasectomy, abnormalities in chromosome number or microdeletions of the azoospermia factor region on the Y chromosome were excluded from the study. Subjects with NOA had no detectable sperm in the ejaculate after evaluation of the centrifuged pellet. To ensure the reliability of the

diagnosis, each individual was examined twice, and the absence of spermatozoa from both replicate samples was taken to indicate azoospermia. The controls had fathered one or more healthy child and were frequency matched to the cases on the basis of age and area of residence. The protocol and consent form were approved by the Institutional Review Boards of Nanjing Medical University. All activities involving human subjects were done under full compliance with government policies and the Helsinki Declaration. Totally, 447 patients with non-obstructive azoospermia and 485 matched healthy male controls were recruited in this study. Written informed consents were obtained from all of them. After completing a questionnaire with detailed information, each subject donated 5 ml of blood for genomic DNA extraction.

### Y chromosome haplogrouping

14 highly informative polymorphic loci for East Asians (M130, YAP, M89, M9, M231, M120, M119, M268, M95, M176, M175, M122, M134 and M117) [44, 45] were used to define 14 Y-hgs following the nomenclature recommended by the Y Chromosome Consortium [46] and its update described by Sengupta et al [47].

The SNaPshot (Applied Biosystems, Foster City, CA) minisequencing reaction assay was used for polymorphism genotyping [48]. The detailed experimental procedures have been well described in our previous study [49].

### CNV genotyping using the AccuCopy method

The AccuCopy technique, a CNV genotyping method based on multiplex fluorescence competitive amplification, was recently developed by Genesky Biotechnologies (Shanghai, China), and well described by Du et al [50]. Limited by the highly homologous sequences and the detect threshold of AccuCopy, only seven gene families were recruited in our study. In order to ensure the reliability of our results, we chose three target genomic segments within the CNV region for the *CT45* and *FAM47* genes, and two for the *NXF2*, *CSAG*, *CTAG*, *H2AFB1*, and *VCX*. According to the reaction condition and stability, these target segments were divided into two panels. The reference genome sequences were obtained from the UCSC Genome Browser (<http://genome.ucsc.edu/genome/assembly/hg19>). Additionally, three reference segments used for normalization were screened and chosen at three loci of *2P*, *16P* and *20q*. The forward (F) and reverse (R) primers of these segments and the size of PCR product amplified from human genomic DNA are provided in Supplementary Table S2, respectively.

AccuCopy assay was modified as one multiplex competitive PCR amplification followed by one labeling extension, in which one of PCR primers for each fragment was synthesized with addition of a universal sequence, i.e. 5'ACACGACCGGTAACGCTTAGA3' at 5' end so that

the PCR products can be FAM-labeled in a subsequent extension reaction using a 5' FAM-modified primer i.e. FAMEF: 5' [FAM] ACACGACCGGTAACGCTTAGA3'. All primers mentioned above were synthesized at Sangon Biotech (Shanghai, China). The competitive DNAs for the three reference and sixteen target segments were designed and synthesized in double strand by Genesky Biotechnologies and provided in a 200 × mixture. The sequences of synthesized competitive DNAs were almost the same as their reference homologies in the human reference genome except 2 bp deletion introduced. The detailed experimental procedures were described previously with minor modifications.

### Statistical analysis

Statistical analyses were carried out using Stata 10.0 statistical software package (Stata Corp, LP). Pearson's chi-squared test was used to demonstrate differences of categorical variables such as drinking and smoking status between cases and controls. Student's *t*-test was used to show differences in continuous variables such as age and body mass index (BMI). Associations between CNVs and the risk of NOA were evaluated by computing odds ratios (ORs) and their 95% confidence intervals (CIs) from logistic regression under different models. The Bonferroni adjustment for multiple testing was applied. The *P*-value for a truly significant result was calculated as  $7.14 \times 10^{-3}$  (0.05/7).

### Functional analysis of VCX CNV

By searching the DGV, we found that there are seven structure variations in VCX and most of them were copy number gains (Supplementary Material, Figure S2). Human VCX cDNA sequence (NM 013452.2) was synthesis by Realgene biotechnology company and inserted in expression vector pcDNA3.1 (+). The recombinant plasmid was confirmed by endonucleases digesting and DNA sequencing.

Three commonly used cell lines (293T cells, GC-1 cells and GC-2 cells) were employed for the function analysis *in vitro* [51–54]. All cell lines were cultured in DMEM (Gibco, USA), with 10% fetal bovine serum (FBS) (Gibco, USA), 100 U mL<sup>-1</sup> penicillin (Gibco, USA), and 100 μg mL<sup>-1</sup> streptomycin (Gibco, USA) at 37°C under 5% CO<sub>2</sub>. Cells were transfected with 4 μg of pcDNA-VCX or pcDNA-NC using Lipofectamine 2000 (Invitrogen, USA). After 24 h transfection, cells were stained with propidium iodide (PI) and annexin V for 30 min, then analyzed by FACS (BD Biosciences, USA) to quantify the cell apoptosis or cell cycle. Cell proliferation was analyzed 24 h after transfection by MTT Assay Kit (Beyotime, China). Each experiment was performed in triplicated independently.

## ACKNOWLEDGMENTS

We thank all the research staff and students who took part in this work. Funding was provided by grants from the National Natural Science Foundation of China (81471500, 81671461 and 81322039), Distinguished Young Scholars of Jiangsu Province (BK20130041) and the Priority Academic Program for the Development of Jiangsu Higher Education Institutions (Public Health and Preventive Medicine).

## CONFLICTS OF INTEREST

None declared.

## Authors' contributions

CL directed the study, obtained financial support and were responsible for study design. JJ performed overall project management with YQ and RW, performed statistical analysis with RZ and ZH, and drafted the initial manuscript. YZ, LS and XL were responsible for cell culture and sample preparation. ZH, DM, HS, YX and XW conceived of the study, and participated in its design and coordination and helped to draft the manuscript. All authors read and approved the final manuscript.

## REFERENCES

1. Hu Z, Li Z, Yu J, Tong C, Lin Y, Guo X, Lu F, Dong J, Xia Y, Wen Y, Wu H, Li H, Zhu Y, et al. Association analysis identifies new risk loci for non-obstructive azoospermia in Chinese men. *Nat Commun.* 2014; 5:3857.
2. Bashamboo A, Ferraz-de-Souza B, Lourenco D, Lin L, Sebire NJ, Montjean D, Bignon-Topalovic J, Mandelbaum J, Siffroi JP, Christin-Maitre S, Radhakrishna U, Rouba H, Ravel C, et al. Human male infertility associated with mutations in NR5A1 encoding steroidogenic factor 1. *Am J Hum Genet.* 2010; 87:505–512.
3. Choi J, Song SH, Bak CW, Sung SR, Yoon TK, Lee DR, Shim SH. Impaired spermatogenesis and gr/gr deletions related to Y chromosome haplogroups in Korean men. *PLoS One.* 2012; 7:e43550.
4. O'Flynn O'Brien KL, Varghese AC, Agarwal A. The genetic causes of male factor infertility: a review. *Fertil Steril.* 2010; 93:1–12.
5. Khil PP, Smirnova NA, Romanienko PJ, Camerini-Otero RD. The mouse X chromosome is enriched for sex-biased genes not subject to selection by meiotic sex chromosome inactivation. *Nat Genet.* 2004; 36:642–646.
6. Reinke V. Sex and the genome. *Nat Genet.* 2004; 36:548–549.
7. Wang PJ, McCarrey JR, Yang F, Page DC. An abundance of X-linked genes expressed in spermatogonia. *Nat Genet.* 2001; 27:422–426.

8. McKee BD, Handel MA. Sex chromosomes, recombination, and chromatin conformation. *Chromosoma*. 1993; 102:71–80.
9. Turner JM. Meiotic sex chromosome inactivation. *Development*. 2007; 134:1823–1831.
10. Zhang YE, Vibranovski MD, Landback P, Marais GA, Long M. Chromosomal redistribution of male-biased genes in mammalian evolution with two bursts of gene gain on the X chromosome. *PLoS Biol*. 2010; 8.
11. Mueller JL, Mahadevaiah SK, Park PJ, Warburton PE, Page DC, Turner JM. The mouse X chromosome is enriched for multicopy testis genes showing postmeiotic expression. *Nat Genet*. 2008; 40:794–799.
12. Iafrate AJ, Feuk L, Rivera MN, Listewnik ML, Donahoe PK, Qi Y, Scherer SW, Lee C. Detection of large-scale variation in the human genome. *Nat Genet*. 2004; 36:949–951.
13. Feuk L, Carson AR, Scherer SW. Structural variation in the human genome. *Nat Rev Genet*. 2006; 7:85–97.
14. Doelken SC, Kohler S, Mungall CJ, Gkoutos GV, Ruef BJ, Smith C, Smedley D, Bauer S, Klopocki E, Schofield PN, Westerfield M, Robinson PN, Lewis SE. Phenotypic overlap in the contribution of individual genes to CNV pathogenicity revealed by cross-species computational analysis of single-gene mutations in humans, mice and zebrafish. *Dis Model Mech*. 2013; 6:358–372.
15. Chapman J, Rees E, Harold D, Ivanov D, Gerrish A, Sims R, Hollingworth P, Stretton A, Holmans P, Owen MJ, O'Donovan MC, Williams J, Kirov G. A genome-wide study shows a limited contribution of rare copy number variants to Alzheimer's disease risk. *Hum Mol Genet*. 2013; 22:816–824.
16. Wang L, Nuytemans K, Bademci G, Jauregui C, Martin ER, Scott WK, Vance JM, Zuchner S. High-resolution survey in familial Parkinson disease genes reveals multiple independent copy number variation events in PARK2. *Hum Mutat*. 2013; 34:1071–1074.
17. Wu N, Ming X, Xiao J, Wu Z, Chen X, Shinawi M, Shen Y, Yu G, Liu J, Xie H, Gucev ZS, Liu S, Yang N, Al-Kateb H, Chen J, Zhang J, et al. TBX6 null variants and a common hypomorphic allele in congenital scoliosis. *N Engl J Med*. 2015; 372:341–350.
18. Carrell DT, Aston KI. The search for SNPs, CNVs, and epigenetic variants associated with the complex disease of male infertility. *Syst Biol Reprod Med*. 2011; 57:17–26.
19. Eggers S, DeBoer KD, van den Bergen J, Gordon L, White SJ, Jamsai D, McLachlan RI, Sinclair AH, O'Bryan MK. Copy number variation associated with meiotic arrest in idiopathic male infertility. *Fertil Steril*. 2015; 103:214–219.
20. Jorgez CJ, Wilken N, Addai JB, Newberg J, Vangapandu HV, Pastuszak AW, Mukherjee S, Rosenfeld JA, Lipshultz LI, Lamb DJ. Genomic and genetic variation in E2F transcription factor-1 in men with nonobstructive azoospermia. *Fertil Steril*. 2015; 103:44–52 e41.
21. Graves JA, Koina E, Sankovic N. How the gene content of human sex chromosomes evolved. *Curr Opin Genet Dev*. 2006; 16:219–224.
22. Isrie M, Froyen G, Devriendt K, de Ravel T, Fryns JP, Vermeesch JR, Van Esch H. Sporadic male patients with intellectual disability: contribution of X-chromosome copy number variants. *European journal of medical genetics*. 2012; 55:577–585.
23. Willemsen MH, de Leeuw N, de Brouwer AP, Pfundt R, Hehir-Kwa JY, Yntema HG, Nillesen WM, de Vries BB, van Bokhoven H, Kleefstra T. Interpretation of clinical relevance of X-chromosome copy number variations identified in a large cohort of individuals with cognitive disorders and/or congenital anomalies. *European journal of medical genetics*. 2012; 55:586–598.
24. Knauff EA, Blauw HM, Pearson PL, Kok K, Wijmenga C, Veldink JH, van den Berg LH, Bouchard P, Fauser BC, Franke L. Copy number variants on the X chromosome in women with primary ovarian insufficiency. *Fertil Steril*. 2011; 95:1584–1588 e1581.
25. Dudding TE, Lawrence O, Winship I, Froyen G, Vandewalle J, Scott R, Shelling AN. Array comparative genomic hybridization for the detection of submicroscopic copy number variations of the X chromosome in women with premature ovarian failure. *Hum Reprod*. 2010; 25:3159–3160; author reply 3160–3151.
26. Chianese C, Gunning AC, Giachini C, Daguin F, Balercia G, Ars E, Lo Giacco D, Ruiz-Castane E, Forti G, Krausz C. X chromosome-linked CNVs in male infertility: discovery of overall duplication load and recurrent, patient-specific gains with potential clinical relevance. *PLoS One*. 2014; 9:e97746.
27. Krausz C, Giachini C, Lo Giacco D, Daguin F, Chianese C, Ars E, Ruiz-Castane E, Forti G, Rossi E. High resolution X chromosome-specific array-CGH detects new CNVs in infertile males. *PLoS One*. 2012; 7:e44887.
28. Tuttelmann F, Simoni M, Kliesch S, Ledig S, Dworniczak B, Wieacker P, Ropke A. Copy number variants in patients with severe oligozoospermia and Sertoli-cell-only syndrome. *PLoS One*. 2011; 6:e19426.
29. Zhou J, Pan J, Eckardt S, Leu NA, McLaughlin KJ, Wang PJ. Nxf3 is expressed in Sertoli cells, but is dispensable for spermatogenesis. *Mol Reprod Dev*. 2011; 78:241–249.
30. Pan J, Eckardt S, Leu NA, Buffone MG, Zhou J, Gerton GL, McLaughlin KJ, Wang PJ. Inactivation of Nxf2 causes defects in male meiosis and age-dependent depletion of spermatogonia. *Dev Biol*. 2009; 330:167–174.
31. Stouffs K, Tournaye H, Liebaers I, Lissens W. Male infertility and the involvement of the X chromosome. *Hum Reprod Update*. 2009; 15:623–637.
32. Zhou J, McCarrey JR, Wang PJ. A 1.1-Mb segmental deletion on the X chromosome causes meiotic failure in male mice. *Biol Reprod*. 2013; 88:159.



33. Stouffs K, Lissens W. X chromosomal mutations and spermatogenic failure. *Biochim Biophys Acta*. 2012; 1822:1864–1872.
34. Taguchi A, Taylor AD, Rodriguez J, Celiktas M, Liu H, Ma X, Zhang Q, Wong CH, Chin A, Girard L, Behrens C, Lam WL, Lam S, et al. A search for novel cancer/testis antigens in lung cancer identifies VCX/Y genes, expanding the repertoire of potential immunotherapeutic targets. *Cancer Res*. 2014; 74:4694–4705.
35. Lahn BT, Page DC. A human sex-chromosomal gene family expressed in male germ cells and encoding variably charged proteins. *Hum Mol Genet*. 2000; 9:311–319.
36. Fukutomi S, Seki N, Koda K, Miyazaki M. Identification of methylation-silenced genes in colorectal cancer cell lines: genomic screening using oligonucleotide arrays. *Scand J Gastroenterol*. 2007; 42:1486–1494.
37. Fratta E, Coral S, Covre A, Parisi G, Colizzi F, Danielli R, Nicolay HJ, Sigalotti L, Maio M. The biology of cancer testis antigens: putative function, regulation and therapeutic potential. *Molecular oncology*. 2011; 5:164–182.
38. Simpson AJ, Caballero OL, Jungbluth A, Chen YT, Old LJ. Cancer/testis antigens, gametogenesis and cancer. *Nat Rev Cancer*. 2005; 5:615–625.
39. Sedha S, Kumar S, Shukla S. Role of Oxidative Stress in Male Reproductive Dysfunctions with Reference to Phthalate Compounds. *Urology journal*. 2015; 12:2304–2316.
40. Huang S, Cui Y, Guo X, Wang L, Li S, Lu Y, Bi Y, Huang X, Lin M, Xia Y, Wang S, Wang X, Zhou Z, et al. 2,2',4,4'-Tetrabromodiphenyl ether disrupts spermatogenesis, impairs mitochondrial function and induces apoptosis of early leptotene spermatocytes in rats. *Reprod Toxicol*. 2015; 51:114–124.
41. Shiraishi K, Naito K, Yoshida K. Vasectomy impairs spermatogenesis through germ cell apoptosis mediated by the p53-Bax pathway in rats. *J Urol*. 2001; 166:1565–1571.
42. Hu Z, Xia Y, Guo X, Dai J, Li H, Hu H, Jiang Y, Lu F, Wu Y, Yang X, Yao B, Lu C, Xiong C, et al. A genome-wide association study in Chinese men identifies three risk loci for non-obstructive azoospermia. *Nat Genet*. 2012; 44:183–186.
43. Lu C, Zhang F, Yang H, Xu M, Du G, Wu W, An Y, Qin Y, Ji G, Han X, Gu A, Xia Y, Song L, et al. Additional genomic duplications in AZFc underlie the b2/b3 deletion-associated risk of spermatogenic impairment in Han Chinese population. *Hum Mol Genet*. 2011; 20:4411–4421.
44. Jin L, Su B. Natives or immigrants: modern human origin in east Asia. *Nat Rev Genet*. 2000; 1:126–133.
45. Jobling MA, Tyler-Smith C. The human Y chromosome: an evolutionary marker comes of age. *Nat Rev Genet*. 2003; 4:598–612.
46. A nomenclature system for the tree of human Y-chromosomal binary haplogroups. *Genome Res*. 2002; 12:339–348.
47. Sengupta S, Zhivotovsky LA, King R, Mehdi SQ, Edmonds CA, Chow CE, Lin AA, Mitra M, Sil SK, Ramesh A, Usha Rani MV, Thakur CM, Cavalli-Sforza LL, et al. Polarity and temporality of high-resolution y-chromosome distributions in India identify both indigenous and exogenous expansions and reveal minor genetic influence of Central Asian pastoralists. *Am J Hum Genet*. 2006; 78:202–221.
48. Salas A, Quintans B, Alvarez-Iglesias V. SNaPshot typing of mitochondrial DNA coding region variants. *Methods Mol Biol*. 2005; 297:197–208.
49. Lu C, Wang Y, Zhang F, Lu F, Xu M, Qin Y, Wu W, Li S, Song L, Yang S, Wu D, Jin L, Shen H, et al. DAZ duplications confer the predisposition of Y chromosome haplogroup K\* to non-obstructive azoospermia in Han Chinese populations. *Hum Reprod*. 2013; 28:2440–2449.
50. Du R, Lu C, Jiang Z, Li S, Ma R, An H, Xu M, An Y, Xia Y, Jin L, Wang X, Zhang F. Efficient typing of copy number variations in a segmental duplication-mediated rearrangement hotspot using multiplex competitive amplification. *J Hum Genet*. 2012; 57:545–551.
51. Bi J, Li Y, Sun F, Saalbach A, Klein C, Miller DJ, Hess R, Nowak RA. Basigin null mutant male mice are sterile and exhibit impaired interactions between germ cells and Sertoli cells. *Dev Biol*. 2013; 380:145–156.
52. Chen H, Yi M, Sheng Y, Cheng H, Zhou R. A novel testis-enriched gene Spata33 is expressed during spermatogenesis. *PLoS One*. 2013; 8:e67882.
53. Miller-Lindholm AK, Bedows E, Bartels CF, Ramey J, Maclin V, Ruddon RW. A naturally occurring genetic variant in the human chorionic gonadotropin-beta gene 5 is assembly inefficient. *Endocrinology*. 1999; 140:3496–3506.
54. Yu YH, Siao FP, Hsu LC, Yen PH. TEX11 modulates germ cell proliferation by competing with estrogen receptor beta for the binding to HPIP. *Mol Endocrinol*. 2012; 26:630–642.
